# Supplementary material for: Bidimensional structure and measurement equivalence of the Patient Health Questionnaire-9: sex-sensitive assessment of depressive symptoms in three representative German cohort studies
Source: Springer Nature journal article supplement (doi:10.1186/s12888-021-03234-x), 2021-05-05
Supplement: MOESM3 [file 19136462]

## **Bidimensional structure and measurement equivalence of the Patient Health**

### **Questionnaire-9: Sex-sensitive assessment of depressive symptoms in three representative**

#### **German cohort studies**

Ana N. Tibubos<sup>1</sup>, Daniëlle Otten<sup>1</sup>, Daniela Zöller<sup>2</sup>, Harald Binder<sup>2,3</sup>, Philipp S. Wild<sup>4,5,6</sup>, Toni Fleischer<sup>7,8</sup>, Hamimatunnisa Johar<sup>9,10</sup>, Seryan Atasoy<sup>9,10,11</sup>, Lara Schulze<sup>7</sup>, Karl-Heinz Ladwig<sup>11</sup>, Georg Schomerus<sup>8</sup>, Birgit Linkohr<sup>10</sup>, Hans J. Grabe<sup>7</sup>, Johannes Kruse<sup>9</sup>, Carsten-Oliver Schmidt<sup>12</sup>, Thomas Münzel<sup>13,14</sup>, Jochem König<sup>15</sup>, \*Elmar Brähler<sup>1</sup>, \*Manfred E. Beutel<sup>1</sup>.

\*Shared last authorship

<sup>1</sup>Department of Psychosomatic Medicine and Psychotherapy, University Medical Center, Johannes Gutenberg-University Mainz, Mainz, Germany

<sup>2</sup>Freiburg Center of Data Analysis and Modelling, Mathematical Institute – Faculty of Mathematics and Physics, University of Freiburg, Freiburg, Germany

<sup>3</sup>Institute of Medical Biometry and Statistics, Faculty of Medicine and Medical Center – University of Freiburg, Freiburg, Germany

<sup>4</sup>Preventive Cardiology and Preventive Medicine, Department of Cardiology, University Medical Center, Johannes Gutenberg-University Mainz, Mainz, Germany

<sup>5</sup>Center for Thrombosis and Hemostasis, University Medical Center, Johannes Gutenberg-University Mainz, Mainz, Germany

<sup>6</sup>DZHK (German Center for Cardiovascular Research), Partner Site Rhine-Main, Mainz, Germany

<sup>7</sup>Department of Psychiatry and Psychotherapy, University Medicine Greifswald, Greifswald, Germany

<sup>8</sup>Department of Psychiatry and Psychotherapy, Leipzig University Medical Center, Leipzig, Germany

<sup>9</sup>Department of Psychosomatic Medicine and Psychotherapy, University of Gießen and Marburg, Gießen, Germany

<sup>10</sup>Institute of Epidemiology, Helmholtz Zentrum München, German Research Center for Environmental Health, Neuherberg, Germany

<sup>11</sup>Department of Psychosomatic Medicine and Psychotherapy, Klinikum rechts der Isar, Technische Universität München, Munich, Germany

<sup>12</sup>Institute for Community Management, University Medicine Greifswald, Greifswald, Germany

<sup>13</sup>Department of Cardiology – Cardiology I, University Medical Center, Johannes Gutenberg-University Mainz, Mainz, Germany

<sup>14</sup>German Center for Cardiovascular Research (DZHK), partner site Rhine-Main, Mainz, Germany

<sup>15</sup>Institute for Medical Biostatistics, Epidemiology and Informatics, University Medical Center, Johannes Gutenberg-University Mainz, Mainz, Germany

Correspondence:

M.Sc. Daniëlle Otten

Department of Psychosomatic Medicine and Psychotherapy

University Medical Center of the Johannes Gutenberg-University Mainz

Langenbeckstraße 1, 55131 Mainz, Germany

Phone: +49 (0)6131 17-7643

E-Mail: [Danielle.Otten@unimedizin-mainz.de](mailto:Danielle.Otten@unimedizin-mainz.de)

**Additional Table 2. ANOVA of overall depressive symptoms, somatic, and cognitive-affective depressive symptoms stratified by cohorts or sex**

| <b>Overall depressive symptoms</b>  |           |           |      |       |        |             |
|-------------------------------------|-----------|-----------|------|-------|--------|-------------|
| <i>Group comparisons</i>            |           | Mean      | SD   | N     | p      | Effect size |
| Cohort                              | GHS       | 4.09      | 3.56 | 14732 | <.0001 | 0.009       |
|                                     | KORA      | 3.36      | 3.30 | 3064  |        |             |
|                                     | SHIP      | 3.18      | 3.33 | 1708  |        |             |
| Sex                                 | women     | 4.35      | 3.63 | 9813  | <.0001 | 0.017       |
|                                     | men       | 3.43      | 3.29 | 9691  |        |             |
| <i>Pairwise comparisons</i>         |           | Mean diff | SD   | LB    | UB     |             |
| Cohort                              | GHS-KORA  | 0.21      | 0.02 | 0.17  | 0.25   |             |
|                                     | GHS-SHIP  | 0.26      | 0.03 | 0.21  | 0.31   |             |
|                                     | KORA-SHIP | 0.05      | 0.03 | -0.01 | 0.11   |             |
| Sex                                 | women-men | 0.26      | 0.01 | 0.24  | 0.29   |             |
| <b>Somatic subscale</b>             |           |           |      |       |        |             |
| <i>Group comparisons</i>            |           | Mean      | SD   | N     | p      | Effect size |
| Cohort                              | GHS       | 2.42      | 2.01 | 14360 | <.0001 | 0.009       |
|                                     | KORA      | 2.03      | 1.95 | 3066  |        |             |
|                                     | SHIP      | 1.89      | 1.87 | 1711  |        |             |
| Sex                                 | women     | 2.61      | 2.07 | 9594  | <.0001 | 0.022       |
|                                     | men       | 2.02      | 1.86 | 9543  |        |             |
| <i>Pairwise comparisons</i>         |           | Mean diff | SD   | LB    | UB     |             |
| Cohort                              | GHS-KORA  | 0.20      | 0.02 | 0.16  | 0.23   |             |
|                                     | GHS-SHIP  | 0.27      | 0.03 | 0.22  | 0.32   |             |
|                                     | KORA-SHIP | 0.07      | 0.03 | 0.01  | 0.13   |             |
| Sex                                 | women-men | 0.30      | 0.01 | 0.27  | 0.33   |             |
| <b>Cognitive-affective subscale</b> |           |           |      |       |        |             |
| <i>Group comparisons</i>            |           | Mean      | SD   | N     | p      | Effect size |
| Cohort                              | GHS       | 1.68      | 1.95 | 14300 | <.0001 | 0.007       |
|                                     | KORA      | 1.33      | 1.74 | 3064  |        |             |
|                                     | SHIP      | 1.30      | 1.80 | 1711  |        |             |
| Sex                                 | women     | 1.76      | 1.97 | 9570  | <.0001 | 0.008       |
|                                     | men       | 1.41      | 1.82 | 9505  |        |             |
| <i>Pairwise comparisons</i>         |           | Mean diff | SD   | LB    | UB     |             |
| Cohort                              | GHS-KORA  | 0.18      | 0.02 | 0.14  | 0.22   |             |
|                                     | GHS-SHIP  | 0.20      | 0.03 | 0.15  | 0.25   |             |
|                                     | KORA-SHIP | 0.02      | 0.03 | -0.04 | 0.08   |             |
| Sex                                 | women-men | 0.18      | 0.01 | 0.15  | 0.21   |             |

Note: Mean diff = standardized mean differences, SD = standard deviation, LB = Lower bound & UB = Upper bound of 95% confidence interval, effect size = partial eta squared ( $\eta_p^2$ ), GHS = Gutenberg Health Study, KORA = Cooperative Health Research in the Augsburg Region, SHIP = Study of Health in Pomerania.
