# Supplementary material for: Bidimensional structure and measurement equivalence of the Patient Health Questionnaire-9: sex-sensitive assessment of depressive symptoms in three representative German cohort studies
Source: Springer Nature journal article supplement (doi:10.1186/s12888-021-03234-x), 2021-05-05
Supplement: MOESM4 [file 19136462]

## **Bidimensional structure and measurement equivalence of the Patient Health**

### **Questionnaire-9: Sex-sensitive assessment of depressive symptoms in three representative**

#### **German cohort studies**

Ana N. Tibubos<sup>1</sup>, Daniëlle Otten<sup>1</sup>, Daniela Zöller<sup>2</sup>, Harald Binder<sup>2,3</sup>, Philipp S. Wild<sup>4,5,6</sup>, Toni Fleischer<sup>7,8</sup>, Hamimatunnisa Johar<sup>9,10</sup>, Seryan Atasoy<sup>9,10,11</sup>, Lara Schulze<sup>7</sup>, Karl-Heinz Ladwig<sup>11</sup>, Georg Schomerus<sup>8</sup>, Birgit Linkohr<sup>10</sup>, Hans J. Grabe<sup>7</sup>, Johannes Kruse<sup>9</sup>, Carsten-Oliver Schmidt<sup>12</sup>, Thomas Münzel<sup>13,14</sup>, Jochem König<sup>15</sup>, \*Elmar Brähler<sup>1</sup>, \*Manfred E. Beutel<sup>1</sup>.

\*Shared last authorship

<sup>1</sup>Department of Psychosomatic Medicine and Psychotherapy, University Medical Center, Johannes Gutenberg-University Mainz, Mainz, Germany

<sup>2</sup>Freiburg Center of Data Analysis and Modelling, Mathematical Institute – Faculty of Mathematics and Physics, University of Freiburg, Freiburg, Germany

<sup>3</sup>Institute of Medical Biometry and Statistics, Faculty of Medicine and Medical Center – University of Freiburg, Freiburg, Germany

<sup>4</sup>Preventive Cardiology and Preventive Medicine, Department of Cardiology, University Medical Center, Johannes Gutenberg-University Mainz, Mainz, Germany

<sup>5</sup>Center for Thrombosis and Hemostasis, University Medical Center, Johannes Gutenberg-University Mainz, Mainz, Germany

<sup>6</sup>DZHK (German Center for Cardiovascular Research), Partner Site Rhine-Main, Mainz, Germany

<sup>7</sup>Department of Psychiatry and Psychotherapy, University Medicine Greifswald, Greifswald, Germany

<sup>8</sup>Department of Psychiatry and Psychotherapy, Leipzig University Medical Center, Leipzig, Germany

<sup>9</sup>Department of Psychosomatic Medicine and Psychotherapy, University of Gießen and Marburg, Gießen, Germany

<sup>10</sup>Institute of Epidemiology, Helmholtz Zentrum München, German Research Center for Environmental Health, Neuherberg, Germany

<sup>11</sup>Department of Psychosomatic Medicine and Psychotherapy, Klinikum rechts der Isar, Technische Universität München, Munich, Germany

<sup>12</sup>Institute for Community Management, University Medicine Greifswald, Greifswald, Germany

<sup>13</sup>Department of Cardiology – Cardiology I, University Medical Center, Johannes Gutenberg-University Mainz, Mainz, Germany

<sup>14</sup>German Center for Cardiovascular Research (DZHK), partner site Rhine-Main, Mainz, Germany

<sup>15</sup>Institute for Medical Biostatistics, Epidemiology and Informatics, University Medical Center, Johannes Gutenberg-University Mainz, Mainz, Germany

Correspondence:

M.Sc. Daniëlle Otten

Department of Psychosomatic Medicine and Psychotherapy

University Medical Center of the Johannes Gutenberg-University Mainz

Langenbeckstraße 1, 55131 Mainz, Germany

Phone: +49 (0)6131 17-7643

E-Mail: [Danielle.Otten@unimedizin-mainz.de](mailto:Danielle.Otten@unimedizin-mainz.de)

**Additional Table 3a. Descriptive statistics of overall depressive symptoms, somatic, and cognitive-affective depressive symptoms stratified by sex and cohorts**

| <b>Overall depressive symptoms</b>  |        |      |      |      |
|-------------------------------------|--------|------|------|------|
| Sex                                 | Cohort | Mean | SD   | N    |
| women                               | GHS    | 4.54 | 3.67 | 7304 |
|                                     | KORA   | 3.84 | 3.45 | 1592 |
|                                     | SHIP   | 3.70 | 3.63 | 917  |
| men                                 | GHS    | 3.64 | 3.38 | 7428 |
|                                     | KORA   | 2.85 | 3.04 | 1472 |
|                                     | SHIP   | 2.57 | 2.83 | 791  |
| <b>Somatic subscale</b>             |        |      |      |      |
| Sex                                 | Cohort | Mean | SD   | N    |
| women                               | GHS    | 2.72 | 2.09 | 7084 |
|                                     | KORA   | 2.32 | 2.03 | 1592 |
|                                     | SHIP   | 2.20 | 1.97 | 918  |
| men                                 | GHS    | 2.13 | 1.89 | 7276 |
|                                     | KORA   | 1.72 | 1.82 | 1474 |
|                                     | SHIP   | 1.52 | 1.67 | 793  |
| <b>Cognitive-affective subscale</b> |        |      |      |      |
| Sex                                 | Cohort | Mean | SD   | N    |
| women                               | GHS    | 1.84 | 2.00 | 7059 |
|                                     | KORA   | 1.51 | 1.82 | 1592 |
|                                     | SHIP   | 1.51 | 2.00 | 919  |
| men                                 | GHS    | 1.51 | 1.89 | 7241 |
|                                     | KORA   | 1.13 | 1.62 | 1472 |
|                                     | SHIP   | 1.05 | 1.50 | 792  |

Note: SD = standard deviation, GHS = Gutenberg Health Study, KORA = Cooperative Health Research in the Augsburg Region, SHIP = Study of Health in Pomerania.

**Additional Table 3b. Two-way ANOVA of depression, somatic , cognitive-affective depression stratified by cohorts, sex and cohort\*sex**

| <b>Overall depressive symptoms</b>  |       |         |         |        |             |
|-------------------------------------|-------|---------|---------|--------|-------------|
|                                     | df    | MS      | F       | p      | Effect size |
| cohorts                             | 2     | 766.38  | 63.699  | <.0001 | 0.006       |
| sex                                 | 1     | 2317.12 | 192.590 | <.0001 | 0.010       |
| cohorts*sex                         | 2     | 10.04   | 0.835   | 0.434  | 0.000       |
| within groups                       | 19498 | 12.03   |         |        |             |
| total                               | 19503 |         |         |        |             |
| <b>Somatic subscale</b>             |       |         |         |        |             |
|                                     | df    | MS      | F       | p      | Effect size |
| cohorts                             | 2     | 256.50  | 66.127  | <.0001 | 0.004       |
| sex                                 | 1     | 891.86  | 229.929 | <.0001 | 0.005       |
| cohorts*sex                         | 2     | 1.88    | 0.485   | 0.616  | 0.000       |
| within groups                       | 19131 | 3.88    |         |        |             |
| total                               | 19136 |         |         |        |             |
| <b>Cognitive-affective subscale</b> |       |         |         |        |             |
|                                     | df    | MS      | F       | p      | Effect size |
| cohorts                             | 2     | 145.30  | 35.686  | <.0001 | 0.004       |
| sex                                 | 1     | 347.27  | 40.293  | <.0001 | 0.005       |
| cohorts*sex                         | 2     | 2.77    | 96.305  | 0.463  | 0.000       |
| within groups                       | 19069 | 3.61    | 0.769   |        |             |
| total                               | 19074 |         |         |        |             |

Note: Df = degree of freedom, MS = Mean squares, effect size = partial eta squared ( $\eta_p^2$ )
